# Supplementary material for: Transcriptomic analysis, genic SSR development, and genetic diversity of proso millet (Panicum miliaceum; Poaceae)
Source: PubMed Central journal article supplement — Appl Plant Sci. 2017 Jul 28;5(7):apps.1600137. doi: 10.3732/apps.1600137 (PMC5546162; doi:10.3732/apps.1600137), 2017-07-28

APPENDIX S3. PCR-amplified products of markers SXAU32 for the 56 proso millet accessions analyzed by fluorescence capillary electrophoresis. Lane H12: 500-bp DNA marker; Lane D1–H9: 56 proso millet accessions. D1: Shaanxi-H, D2: HC-Red, D3: Shaanxi-B1, D4: Shaanxi-Purple, D5: Shanxi-1, D6: Heilongjiang-Y1, D7: Heilongjiang-Y2, D8: Heilongjiang-R1, D9: Heilongjiang-M1, D10: Heilongjiang-B1, D11: Heilongjiang-R2, D12: Heilongjiang-Y3, E1: Jilin-Y1, E2: Jilin-R1, E3: Liaoning-G1, E4: Liaoning-G2, E5: Neimenggu-B1, E6: Ningxia-M1, E7: Shaanxi-B2, E8: Shaanxi-B3, E9: Neimenggu-Y2, E10: Ningxia-Purple, E11: Gansu-G1, E12: Gansu-R1, F1: Shaanxi-L1, F2: Guangdong-G1, F3: Anhui-M1, F4: Gansu-R2, F5: Shaanxi-W1, F6: Jilin-Br1, F7: Jilin-B1, F8: Liaoning-Purple, F9: Hebei-H1, F10: Hebei-Y1, F11: Shanxi-R1, F12: Shanxi-R2, G1: Shanxi-B1, G2: Ningxia-G1, G3: Ningxia-Y1, G4: Shanxi-Y1, G5: Shandong-Y1, G6: Ningxia-Purple, G7: Hebei-H1, G8: Hebei-Y1, G9: Neimenggu-R1, G10: Neimenggu-Y1, G11: Ningxia-R1, G12: Neimenggu-E1, H1: Ningxia-Y2, H2: Shandong-W1, H3: Xinjiang-M1, H4: Gansu-Y1, H5: Qinghai-Y1, H6: Qinghai-Br1, H7: Qinghai-W1, H8: Qinghai-W2. The bands below 75 bp are either nonspecific amplification products or nontarget bands as primer dimers.

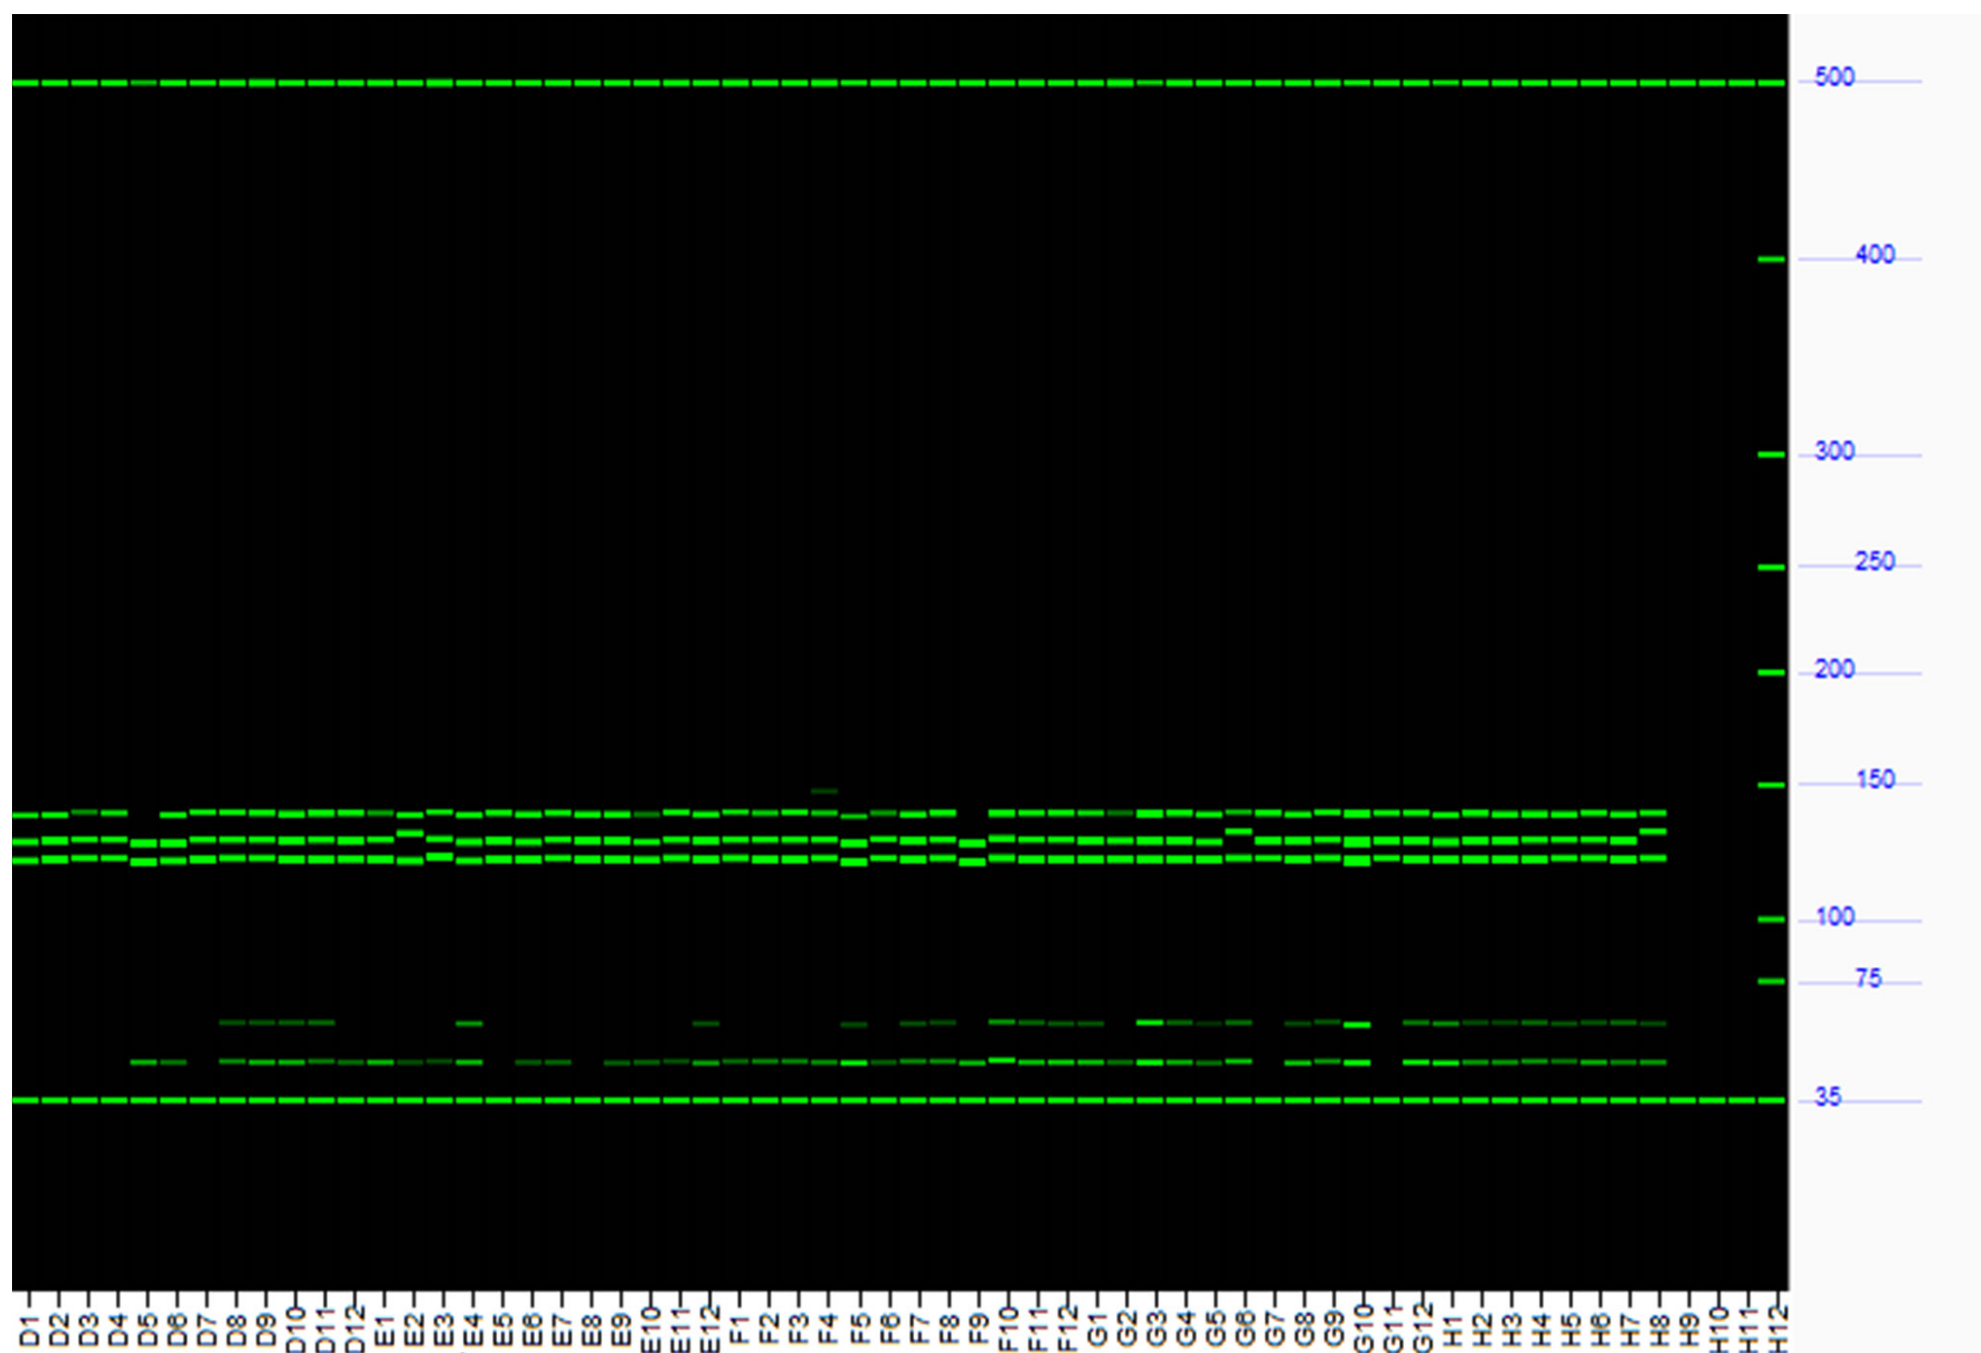

Supplement: apps.1600137_s3.pdf [file apps.1600137_s3.pdf]
